# Supplementary material
Source: Springer Nature journal article supplement (https://www.springermedizin.de/resource/supplementary/12939_2009_171_MOESM4_ESM.pdf/9551642)

### Northeast

### North

### Center West

### South

### Southeast

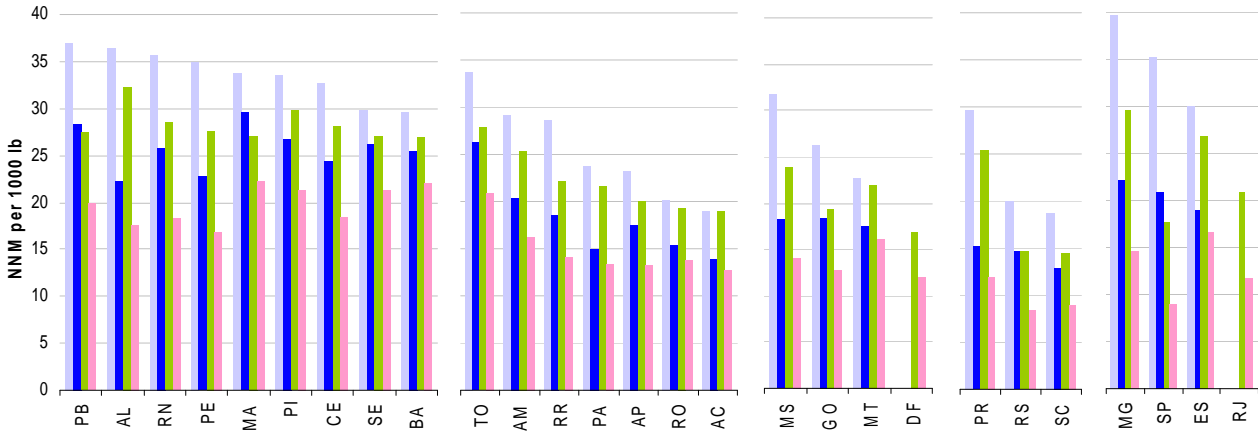

■ NNM 1991 poor   
 ■ NNM 2000 poor   
 ■ NNM 1991 Non poor   
 ■ NNM 2000 Non poor

Supplement: MOESM4 [file 9551642]
